# Supplementary material for: Vibrational spectra of neutral and doped oligothiophenes and polythiophene
Source: Royal Society of Chemistry journal article supplement (doi:10.1039/d2ra07625j), 2023-01-01
Supplement: d2ra07625j1.pdf [file d2ra07625j1.pdf]

## Electronic supplementary information for:

# Vibrational spectra of neutral and doped oligothiophenes and polythiophene

Stewart F. Parker,\* Jessica E. Trevelyan and Hamish Cavaye

ISIS Neutron and Muon Source, STFC Rutherford Appleton Laboratory, Chilton, Didcot, OX11 0QX, UK

\*Author to whom correspondence should be addressed. E-mail: [stewart.parker@stfc.ac.uk](mailto:stewart.parker@stfc.ac.uk)

### Characterisation of polythiophene

The polythiophene (PT) used in this work was purchased from Reike Metals. PT is insoluble in all common solvents, so it is not possible to characterise the molecular weight by conventional methods, such as gel permeation chromatography (GPC). However, there are some empirical correlations between the degree of polymerisation, conjugation length and the infrared and Raman spectra [1-3].

In the infrared spectrum, the ratio of the bands at 690 and 790  $\text{cm}^{-1}$  (0.32, assigned to chain ends and internal rings respectively) corresponds to a degree of polymerisation ( $N_{\text{dp}}$ ) of 8.7 [1,2]. This is certainly an underestimate as it would predict that the spectra of 8T and PT would be almost identical. Inspection of Figures 2-4, shows that this is not the case, so the sequence length must be longer.

Similarly, the ratio of the C1=C2 and C3=C4 antisymmetric (out-of-phase, 1490  $\text{cm}^{-1}$ ) and symmetric (in-phase, ~1439  $\text{cm}^{-1}$ ) stretching modes can be used to determine the conjugation length ( $N_{\text{c}}$ ) [1,2] (See Figure 11 for the numbering). For this material, the ratio is 0.77, corresponding to a conjugation length  $>6$ . The line width of the symmetric mode in the Raman spectrum is inversely correlated with  $N_{\text{c}}$  [3]. The observed line width (16  $\text{cm}^{-1}$ ) is consistent with the infrared results and implies a high degree of conjugation.

In the Raman spectrum, bands at 652, 682, 1155 and 1177  $\text{cm}^{-1}$  “arise from the distorted parts in the polymers” [3]. None of these are seen in our sample.

Together, these results indicate that our sample shows a relatively low degree of polymerisation but the resulting material is highly conjugated (i.e. it exhibits the alternating S-up, S-down, S-up conformation shown in Figure 1) and is essentially defect free. We note that the conductivity of the doped materials is more correlated with  $N_{\text{c}}$  than  $N_{\text{dp}}$  [1].

[1] M. Akimoto, Y. Furukawa, H. Takeuchi, I. Harada, Y. Soma and M. Soma, *Synth. Metals* 1986, **15**, 353-360

[2] Y. Furukawa, M. Akimoto and I. Harada, *Synth. Metals*, 1987, **18**, 151-156.

[3] J. L. Sauvajol, G. Poussigue, C. Benoit, J. P. Lère-Porte and C. Chorro, *Synth. Metals*, 1997, **84**, 569-570.

**Table S1** Assignment of the vibrational spectrum of polythiophene from a periodic-DFT calculation of the complete unit cell (space group  $Pnma$ ,  $Z = 2$ ) at the  $\Gamma$ -point of the Brillouin zone.

| Mode number | Transition energy / $\text{cm}^{-1}$ | Symmetry | IR activity / $\text{km mol}^{-1}$ | IR allowed? | Raman allowed? | Average <sup>a</sup> / $\text{cm}^{-1}$ | Range <sup>b</sup> / $\text{cm}^{-1}$ | Description                     |
|-------------|--------------------------------------|----------|------------------------------------|-------------|----------------|-----------------------------------------|---------------------------------------|---------------------------------|
| 1           | 0                                    | B1u      | 0.00                               | N           | N              | 0                                       | 0                                     | Acoustic mode                   |
| 2           | 0                                    | B2u      | 0.00                               | N           | N              | 13                                      | 27                                    | Acoustic mode                   |
| 3           | 0                                    | B3u      | 0.00                               | N           | N              |                                         |                                       | Acoustic mode                   |
| 4           | 27                                   | Au       | 0.00                               | N           | N              |                                         |                                       | Translation                     |
| 5           | 45                                   | B3u      | 0.06                               | Y           | N              | 69                                      | 47                                    | Translation                     |
| 6           | 90                                   | Ag       | 0.00                               | N           | Y              |                                         |                                       | Libration                       |
| 7           | 92                                   | B1u      | 1.65                               | Y           | N              | 97                                      | 15                                    | Translation                     |
| 8           | 105                                  | B1u      | 0.02                               | Y           | N              | 105                                     | 1                                     | Inter-ring torsion              |
| 9           | 105                                  | B2g      | 0.00                               | N           | Y              |                                         |                                       | Libration                       |
| 10          | 106                                  | B3u      | 6.17                               | Y           | N              |                                         |                                       | Inter-ring torsion              |
| 11          | 140                                  | Ag       | 0.00                               | N           | Y              | 148                                     | 15                                    | Libration                       |
| 12          | 154                                  | B2u      | 1.84                               | Y           | N              | 165                                     | 23                                    | Libration                       |
| 13          | 155                                  | B2g      | 0.00                               | N           | Y              |                                         |                                       | Libration                       |
| 14          | 177                                  | Au       | 0.00                               | N           | N              |                                         |                                       | Libration                       |
| 15          | 189                                  | Au       | 0.00                               | N           | N              | 189                                     | 0                                     | Inter-ring in-plane deformation |
| 16          | 190                                  | B2u      | 9.85                               | Y           | N              |                                         |                                       | Inter-ring in-plane deformation |

|    |     |     |       |   |   |     |   |                                 |
|----|-----|-----|-------|---|---|-----|---|---------------------------------|
| 17 | 286 | Ag  | 0.00  | N | Y | 286 | 0 | Inter-ring in-plane deformation |
| 18 | 286 | B2g | 0.00  | N | Y |     |   | Inter-ring in-plane deformation |
| 19 | 368 | B1g | 0.00  | N | Y | 372 | 7 | Intra-ring torsion              |
| 20 | 376 | B3g | 0.00  | N | Y |     |   | Intra-ring torsion              |
| 21 | 395 | B3g | 0.00  | N | Y | 395 | 0 | Inter-ring in-plane deformation |
| 22 | 395 | B1g | 0.00  | N | Y |     |   | Inter-ring in-plane deformation |
| 23 | 437 | B1u | 24.81 | Y | N | 440 | 5 | Intra-ring torsion              |
| 24 | 442 | B3u | 60.44 | Y | N |     |   | Intra-ring torsion              |
| 25 | 516 | B3g | 0.00  | N | Y | 517 | 1 | Inter-ring in-plane deformation |
| 26 | 518 | B1g | 0.00  | N | Y |     |   | Inter-ring in-plane deformation |
| 27 | 551 | Au  | 0.00  | N | N | 555 | 9 | Intra-ring torsion              |
| 28 | 556 | B2g | 0.00  | N | Y |     |   | Intra-ring torsion              |
| 29 | 559 | Ag  | 0.00  | N | Y | 557 | 2 | Intra-ring torsion              |
| 30 | 560 | B2u | 3.25  | Y | N |     |   | Intra-ring torsion              |
| 31 | 585 | B1u | 0.31  | Y | N | 585 | 0 | Inter-ring in-plane deformation |
| 32 | 585 | B3u | 0.01  | Y | N |     |   | Inter-ring in-plane deformation |
| 33 | 590 | B3g | 0.00  | N | Y | 592 | 5 | Intra-ring torsion              |

|    |     |     |        |   |   |     |    |                                 |
|----|-----|-----|--------|---|---|-----|----|---------------------------------|
| 34 | 595 | B1g | 0.00   | N | Y |     |    | Intra-ring torsion              |
| 35 | 693 | Ag  | 0.00   | N | Y | 695 | 3  | Intra-ring in-plane deformation |
| 36 | 696 | B2g | 0.00   | N | Y |     |    | Intra-ring in-plane deformation |
| 37 | 723 | B1g | 0.00   | N | Y | 724 | 2  | Intra-ring in-plane deformation |
| 38 | 725 | B3g | 0.00   | N | Y |     |    | Intra-ring in-plane deformation |
| 39 | 726 | B2u | 33.02  | Y | N | 727 | 2  | Intra-ring in-plane deformation |
| 40 | 728 | Au  | 0.00   | N | N |     |    | Intra-ring in-plane deformation |
| 41 | 764 | B3u | 365.70 | Y | N | 764 | 0  | Out-of-plane C-H bend           |
| 42 | 764 | B1u | 130.22 | Y | N |     |    | Out-of-plane C-H bend           |
| 43 | 774 | Ag  | 0.00   | N | Y | 780 | 12 | Out-of-plane C-H bend           |
| 44 | 786 | B2g | 0.00   | N | Y |     |    | Out-of-plane C-H bend           |
| 45 | 835 | B1u | 42.63  | Y | N | 836 | 1  | Intra-ring in-plane deformation |
| 46 | 836 | B3u | 25.55  | Y | N |     |    | Intra-ring in-plane deformation |
| 47 | 853 | B2u | 0.25   | Y | N | 853 | 1  | Out-of-plane C-H bend           |
| 48 | 854 | Au  | 0.00   | N | N |     |    | Out-of-plane C-H bend           |
| 49 | 869 | B1g | 0.00   | N | Y | 871 | 5  | Out-of-plane C-H bend           |
| 50 | 874 | B3g | 0.00   | N | Y |     |    | Out-of-plane C-H bend           |

|    |      |     |       |   |   |      |    |                                 |
|----|------|-----|-------|---|---|------|----|---------------------------------|
| 51 | 897  | B2u | 46.97 | Y | N | 898  | 2  | In-plane C-H bend               |
| 52 | 899  | Au  | 0.00  | N | N |      |    | In-plane C-H bend               |
| 53 | 1032 | Ag  | 0.00  | N | Y | 1035 | 6  | In-plane C-H bend               |
| 54 | 1038 | B2g | 0.00  | N | Y |      |    | In-plane C-H bend               |
| 55 | 1069 | B1u | 52.25 | Y | N | 1075 | 13 | In-plane C-H bend               |
| 56 | 1081 | B3u | 28.09 | Y | N |      |    | In-plane C-H bend               |
| 57 | 1165 | Au  | 0.00  | N | N | 1167 | 2  | In-plane C-H bend               |
| 58 | 1168 | B2u | 64.20 | Y | N |      |    | In-plane C-H bend               |
| 59 | 1211 | B3g | 0.00  | N | Y | 1211 | 0  | Intra-ring in-plane deformation |
| 60 | 1211 | B1g | 0.00  | N | Y |      |    | Intra-ring in-plane deformation |
| 61 | 1219 | B2g | 0.00  | N | Y | 1221 | 4  | Intra-ring in-plane deformation |
| 62 | 1223 | Ag  | 0.00  | N | Y |      |    | Intra-ring in-plane deformation |
| 63 | 1231 | B1u | 10.49 | Y | N | 1235 | 8  | Intra-ring in-plane deformation |
| 64 | 1240 | B3u | 0.46  | Y | N |      |    | Intra-ring in-plane deformation |
| 65 | 1280 | B1g | 0.00  | N | Y | 1280 | 1  | Inter-ring stretch              |
| 66 | 1281 | B3g | 0.00  | N | Y |      |    | Inter-ring stretch              |
| 67 | 1382 | B2g | 0.00  | N | Y | 1382 | 1  | Ring stretch                    |
| 68 | 1383 | Ag  | 0.00  | N | Y |      |    | Ring stretch                    |
| 69 | 1426 | B2g | 0.00  | N | Y | 1427 | 2  | Ring stretch                    |

|    |      |     |         |   |   |      |   |                          |
|----|------|-----|---------|---|---|------|---|--------------------------|
| 70 | 1428 | Ag  | 0.00    | N | Y |      |   | Ring stretch             |
| 71 | 1455 | B1u | 30.97   | Y | N | 1455 | 1 | Ring stretch             |
| 72 | 1456 | B3u | 17.89   | Y | N |      |   | Ring stretch             |
| 73 | 1457 | Au  | 0.00    | N | N | 1458 | 2 | Ring stretch             |
| 74 | 1459 | B2u | 1375.97 | Y | N |      |   | Ring stretch             |
| 75 | 1554 | B1g | 0.00    | N | Y | 1554 | 1 | Ring stretch             |
| 76 | 1555 | B3g | 0.00    | N | Y |      |   | Ring stretch             |
| 77 | 3120 | Au  | 0.00    | N | N | 3120 | 1 | Out-of-phase C-H stretch |
| 78 | 3121 | B1g | 0.00    | N | Y | 3121 | 1 | Out-of-phase C-H stretch |
| 79 | 3121 | B2u | 196.83  | Y | N |      |   | Out-of-phase C-H stretch |
| 80 | 3121 | B3g | 0.00    | N | Y |      |   | Out-of-phase C-H stretch |
| 81 | 3131 | B1u | 0.35    | Y | N | 3132 | 0 | In-phase C-H stretch     |
| 82 | 3132 | B3u | 19.26   | Y | N |      |   | In-phase C-H stretch     |
| 83 | 3132 | Ag  | 0.00    | N | Y | 3133 | 1 | In-phase C-H stretch     |
| 84 | 3133 | B2g | 0.00    | N | Y |      |   | In-phase C-H stretch     |

<sup>a</sup> Average of the factor group split transition energies at the  $\Gamma$ -point.

<sup>b</sup> Difference between the highest and lowest transition energy of the factor group at the  $\Gamma$ -point.
